# Supplementary material for: Foams stabilized with solid particles carrying stimuli-responsive polymer hairs
Source: Royal Society of Chemistry journal article supplement (doi:10.1039/c6sm00425c), 2016-01-01
Supplement: c6sm00425c1.pdf [file c6sm00425c1.pdf]

## Electronic Supplementary Information

*Soft Matter* manuscript

‘Foams Stabilized with Solid Particles  
Carrying Stimuli-responsive Polymer Hairs’

by S. Nakayama *et al.*

Corresponding author:

Dr. Syuji Fujii; syuji.fujii@oit.ac.jp

**Table S1.** Reaction conditions for the atom transfer radical polymerization of DEA using AMBEP<sup>a)</sup> and molecular weights and their distributions data for PDEA<sub>n</sub>-based macroinitiators.

|                                           |         | PDEA <sub>30</sub> -PS <sup>b)</sup> | PDEA <sub>60</sub> -PS <sup>c)</sup> | PDEA <sub>90</sub> -PS <sup>d)</sup> |
|-------------------------------------------|---------|--------------------------------------|--------------------------------------|--------------------------------------|
| AMBEP                                     | (g)     | 0.528                                | 0.264                                | 0.176                                |
| DEA                                       | (g)     | 10.0                                 | 10.0                                 | 10.0                                 |
| Isopropanol                               | (mL)    | 10.0                                 | 10.0                                 | 10.0                                 |
| Cu(I)Cl                                   | (g)     | 0.178                                | 0.089                                | 0.061                                |
| Bpy                                       | (g)     | 0.562                                | 0.281                                | 0.188                                |
| <hr/>                                     |         |                                      |                                      |                                      |
| $M_n$ (cal) <sup>e)</sup>                 | (g/mol) | 11613                                | 22700                                | 33845                                |
| $M_n$ (GPC) <sup>f)</sup>                 | (g/mol) | 18100                                | 22200                                | 26000                                |
| $M_w$ (GPC) <sup>g)</sup>                 | (g/mol) | 20000                                | 25000                                | 29800                                |
| $M_w/M_n$ <sup>h)</sup>                   |         | 1.10                                 | 1.12                                 | 1.14                                 |
| $M_n$ ( <sup>1</sup> H NMR) <sup>i)</sup> | (g/mol) | 12800                                | 23100                                | 34300                                |
| DP <sup>j)</sup>                          |         | 33                                   | 61                                   | 91                                   |

<sup>a)</sup> 25 °C, 24 h, N<sub>2</sub>

<sup>b)</sup> AMBEP / DEA / Cu(I)Cl / Bpy, 1 / 60 / 2 / 4 (molar ratio)

<sup>c)</sup> AMBEP / DEA / Cu(I)Cl / Bpy, 1 / 120 / 2 / 4 (molar ratio)

<sup>d)</sup> AMBEP / DEA / Cu(I)Cl / Bpy, 1 / 180 / 2 / 4 (molar ratio)

<sup>e)</sup> Theoretical number-average molecular weight

<sup>f)</sup> Number-average molecular weight determined by GPC

<sup>g)</sup> Weight-average molecular weight determined by GPC

<sup>h)</sup> Polydispersity determined by GPC

<sup>i)</sup> Number-average molecular weight determined by <sup>1</sup>H NMR spectroscopy

<sup>j)</sup> Degree of polymerization determined by <sup>1</sup>H NMR spectroscopy

**Table S2.** Recipes for syntheses of the PDEA<sub>n</sub>-PS latex particles by dispersion polymerization<sup>a)</sup>.

|                                         |      | PDEA <sub>30</sub> -PS | PDEA <sub>60</sub> -PS | PDEA <sub>90</sub> -PS |
|-----------------------------------------|------|------------------------|------------------------|------------------------|
| PDEA <sub>30</sub> -MAI <sup>b,c)</sup> | (g)  | 2.787                  | —                      | —                      |
| PDEA <sub>60</sub> -MAI <sup>b,c)</sup> | (g)  | —                      | 5.455                  | —                      |
| PDEA <sub>90</sub> -MAI <sup>b,c)</sup> | (g)  | —                      | —                      | 3.250                  |
| VA-086 <sup>b,c)</sup>                  | (g)  | 0.623                  | 0.623                  | 0.249                  |
| Styrene <sup>c)</sup>                   | (g)  | 25                     | 25                     | 10                     |
| Isopropanol                             | (mL) | 250                    | 250                    | 100                    |

<sup>a)</sup> 80 °C, 1 week, N<sub>2</sub>, 300 rpm,  $R_i = 7.93 \times 10^{13} \text{ mL}^{-1} \text{ s}^{-1}$

<sup>b)</sup> PDEA-MAI / VA-086, 1/10 (molar ratio)

<sup>c)</sup> Azo group / styrene, 1/100 (molar ratio)

**Table S3.** Particle size measured for PDEA<sub>n</sub>-PS particles at various stirring rates in dispersion apparatus. Measurements were conducted at pH 10 and 0.1 M NaCl. See also Figure S3 for particle size distribution curves.

|          | <b><i>n</i> = 30</b><br><i>D<sub>v</sub></i> / nm | <b><i>n</i> = 60</b><br><i>D<sub>v</sub></i> / nm | <b><i>n</i> = 90</b><br><i>D<sub>v</sub></i> / nm |
|----------|---------------------------------------------------|---------------------------------------------------|---------------------------------------------------|
| 1000 rpm | 21380 ± 45810                                     | 18000 ± 27450                                     | 28280 ± 41090                                     |
| 2000 rpm | 690 ± 280                                         | 10670 ± 4560                                      | 17570 ± 23670                                     |
| 3000 rpm | 680 ± 240                                         | 7310 ± 3000                                       | 9450 ± 7540                                       |

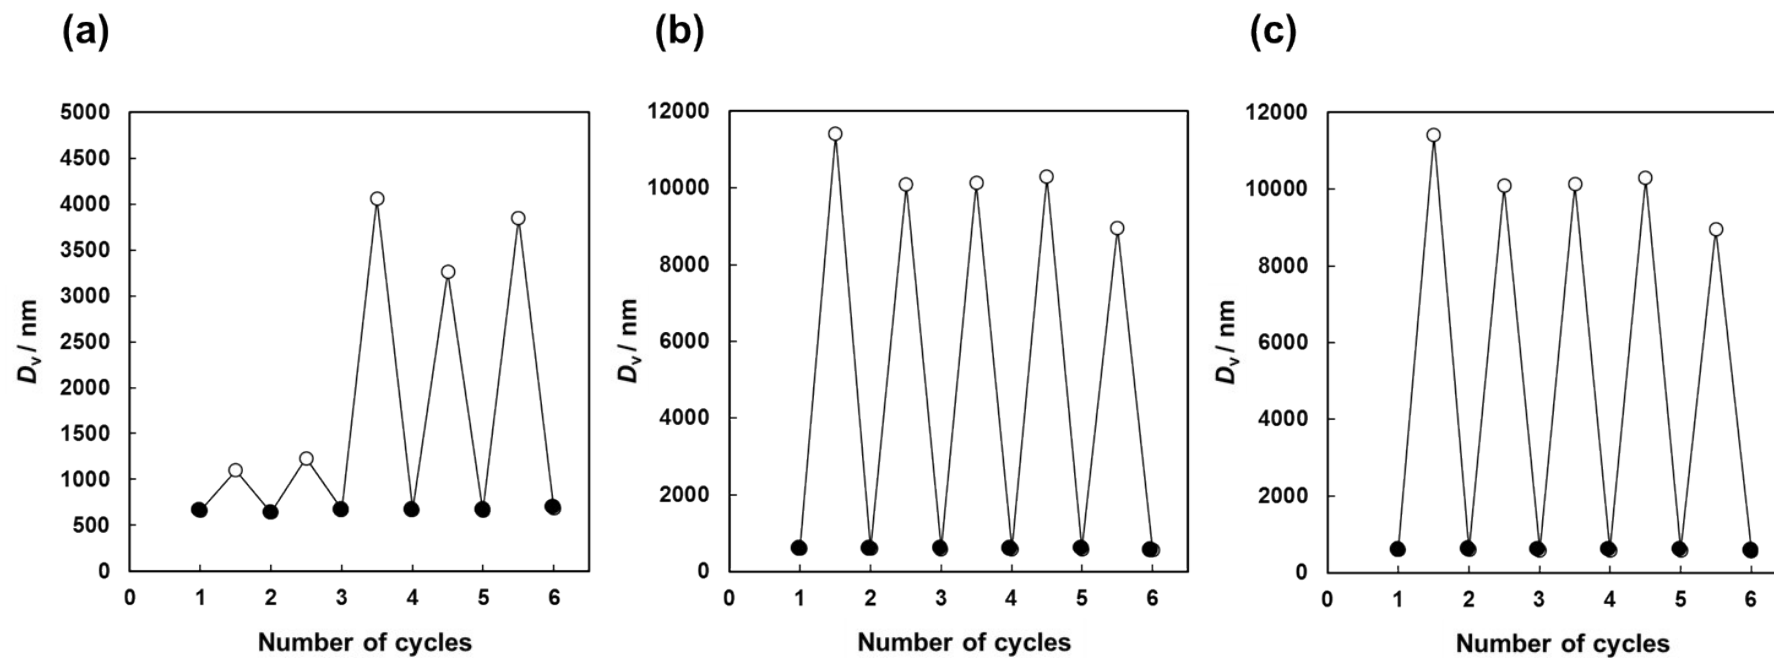

**Figure S1.** Volume-average diameters of the PDEA<sub>n</sub>-PS particles versus the number of pH cycles between pH 3 and pH 10:  $n =$  (a) 30, (b) 60, (c) 90.

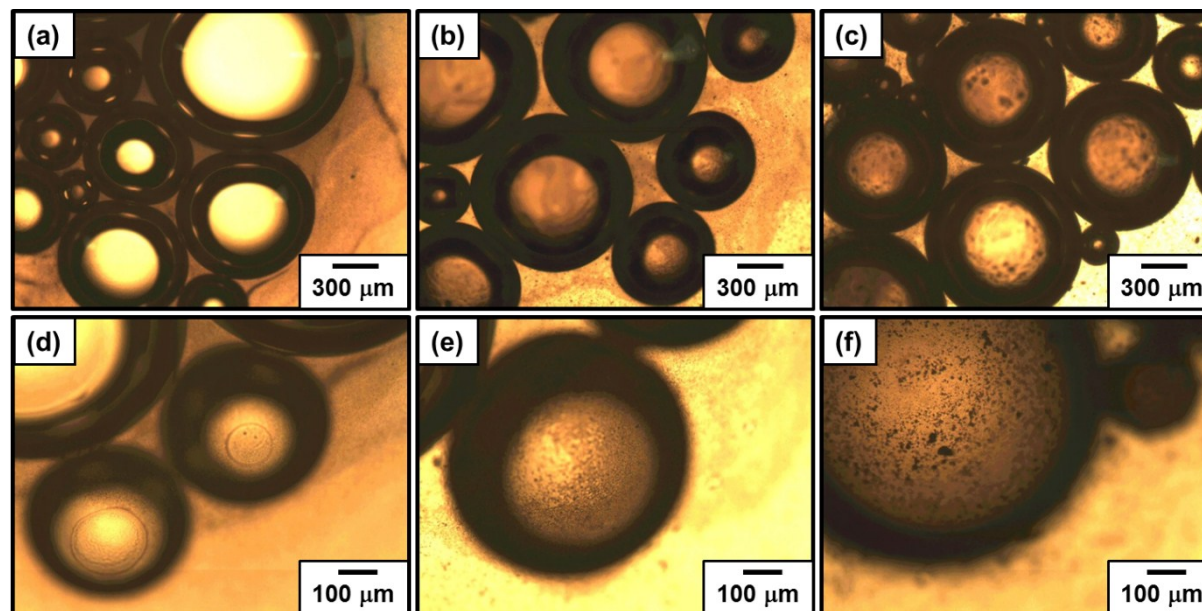

**Figure S2.** Optical microscopy images of bubbles stabilized with PDEA<sub>n</sub>-PS particles ( $n =$  (a, d) 30, (b, e) 60 and (c, f) 90) at pH 10. Figs. (d-f) are magnified images of Figs. (a-c), respectively. Bubbles were prepared using a touch mixer.

(a) PDEA<sub>30</sub>-PS

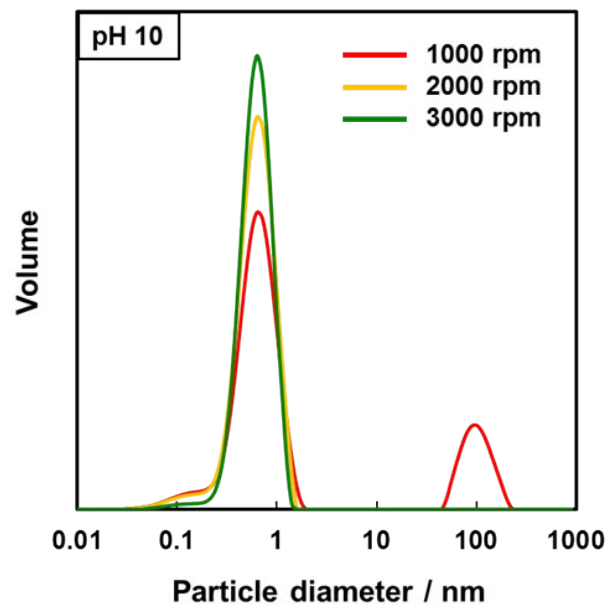

(b) PDEA<sub>60</sub>-PS

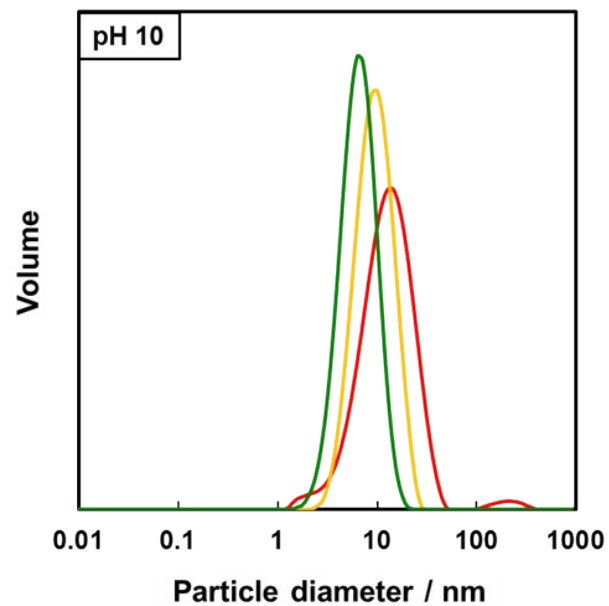

(c) PDEA<sub>90</sub>-PS

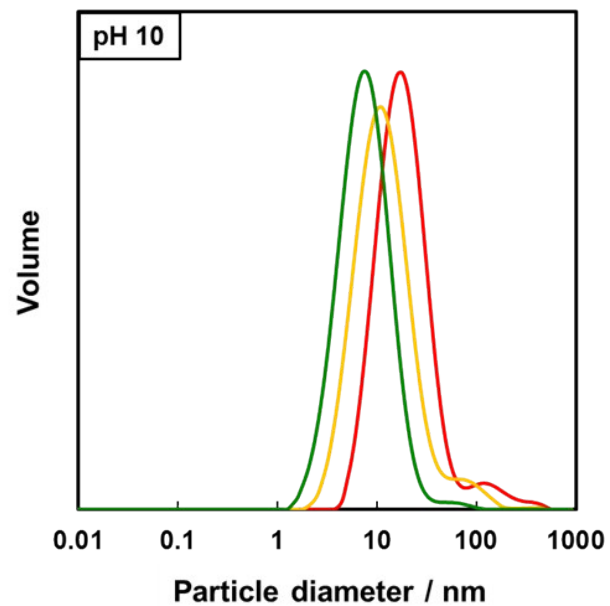

**Figure S3.** Particle size distribution curves obtained for PDEA<sub>n</sub>-PS particles at various stirring rates in dispersion apparatus. Measurements were conducted at pH 10 and 0.1 M NaCl.

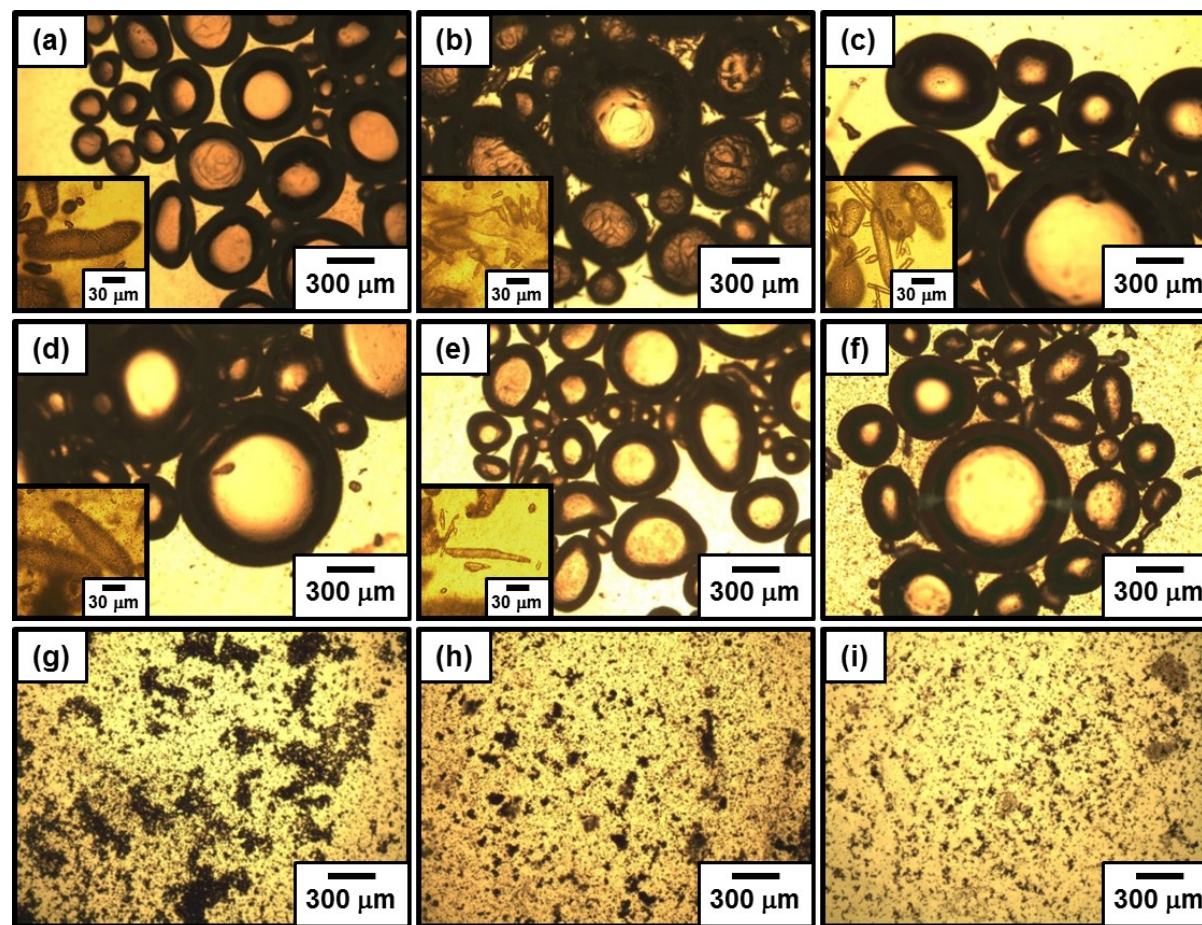

**Figure S4.** Optical microscopy images of foams stabilized with PDEA<sub>60</sub>-PS particles (pH 10, 0.1 M NaCl) prepared at particle concentrations of (a) 0.5 wt%, (b) 1.0 wt%, (c) 2.0 wt%, (d) 5.0 wt%, (e) 10.0 wt%, (f) 15.0 wt%, (g) 20.0 wt%, (h) 30.0 wt% and (i) 40.0 wt%. Insets in Figs. (a-e) are magnified images showing non-spherical bubbles stabilized with PDEA<sub>60</sub>-PS latex particles.



## Dispersal experiments

(8.0 g distilled water+ 0.01 g dried PDEA-PS powder)

### Homogenizer

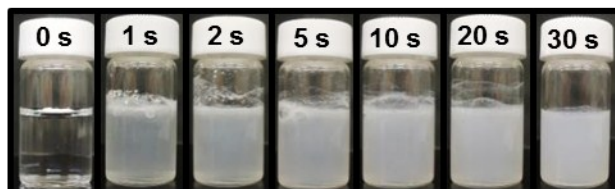

Dispersal  
~ 20 s

### Touch mixer

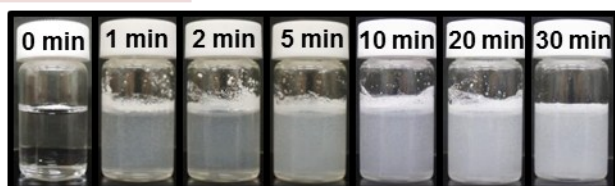

Dispersal  
> 30 s

## Mixing experiments

(8.0 g water + one droplet of Alizarine Blue Black B aqueous solution: 2.5 wt%)

### Homogenizer

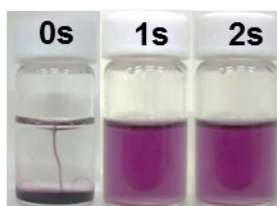

Homogeneous < 1 s

### Touch mixer

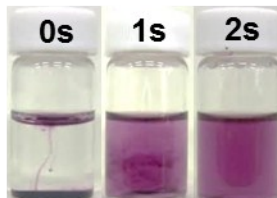

Homogeneous ~ 2 s

**Figure S5.** A comparison of mixing efficiencies of the homogenizer and the touch mixer.



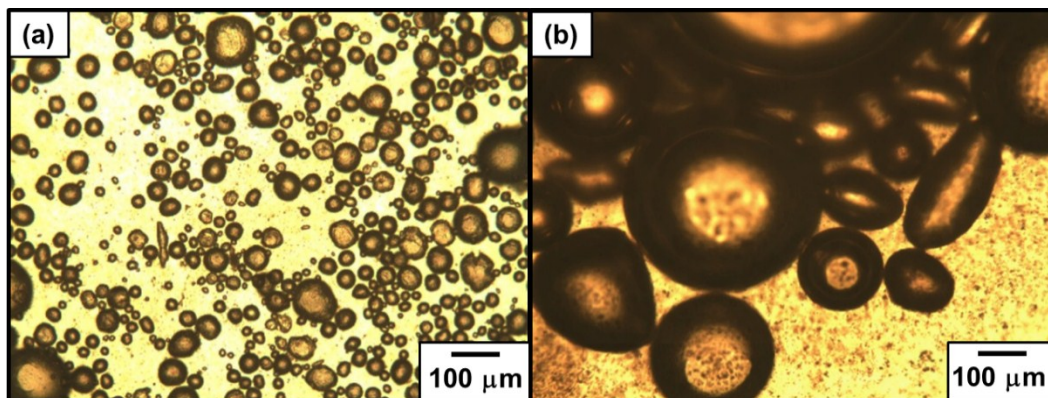

**Figure S6.** Optical microscopy images of bubbles stabilized with PDEA<sub>60</sub>-PS particles (10 wt%, pH 10, 0.1 M NaCl). Preparation conditions: (a) homogenizer, 20000 rpm; (b) touch mixer, 2500 rpm.
